# Supplementary material
Source: PubMed Central journal article supplement (PMC4289665)
Supplement: NIHMS613742-supplement-01.pdf [file NIHMS613742-supplement-01.pdf]

**Supplemental Table:** Survey Clinical Vignettes

| <b>Clinical Vignette</b>                                                                               | <b>Providers who would perform<br/>ultrasound-based<br/>HCC surveillance*</b> |
|--------------------------------------------------------------------------------------------------------|-------------------------------------------------------------------------------|
| 50 year old patient with compensated cirrhosis                                                         | 109 (83%)                                                                     |
| 80 year old patient with compensated cirrhosis                                                         | 66 (50%)                                                                      |
| 50 year old morbidly obese patient (BMI > 45) with compensated cirrhosis                               | 83 (63%)                                                                      |
| 50 year old patient with cirrhosis and ascites                                                         | 89 (68%)                                                                      |
| 50 year old patient with HCV infection but no cirrhosis                                                | 101 (77%)                                                                     |
| 50 year old patient with cirrhosis, severe congestive heart failure and prior cerebrovascular accident | 72 (55%)                                                                      |
